# Supplementary material
Source: MDPI journal article supplement (https://www.mdpi.com/2076-3417/12/10/5186)
Supplement: s1 [file s1]

# Supplementary Materials: User Trust Inference in Online Social Network: A Message Passing Perspective

Yu Liu  and Bai Wang

## 1. Feature statistics

As listed in Table 2 in the paper, the types of features are user profile statistical features ( $\mathcal{F}_{\text{PRF}}$ ), user review linguistic and stylistic features ( $\mathcal{F}_{\text{UGC}}$ ), propagative trust features ( $\mathcal{F}_{\text{TP}}$ ) and auxiliary features. Tables 3, 4 and 5 give brief descriptions for each feature from the former three types about how they are built. Based on the Ising / Potts model, the auxiliary features are in two categories: one ( $\mathcal{F}_{\text{TAUX}}$ ) is for any edge between a user node and a trustRelation node, the other ( $\mathcal{F}_{\text{TPAUX}}$ ) is for edges between trustRelation nodes. Here, we further provide detailed statistics on features used in the paper.

For user profile statistical features in feature set  $\mathcal{F}_{\text{PRF}}$  and user review linguistic and stylistic features in feature set  $\mathcal{F}_{\text{UGC}}$ , all of their values are uniformly scaled to be integers in  $[0, 100]$ . Through such scaling, each of these features is guaranteed to be discrete. For example, features named with “nReviews” prefix will have a total of 101 features of names “nReviews0”, “nReviews1”, ..., “nReviews100”. Furthermore, each feature will be attached to either a node with a specific state or an edge with a specific state-state pair, and then the total number of features of a same name will be multiplied by the number of states of the node or the number of state-state pairs of the edge. In this way, the numbers of node and edge features used for the proposed model are listed in Table S1. Besides, although each edge feature has a corresponding mirrored feature in our implementation of the proposed model, due to the way we implement an undirected edge as two opposite directed edges, the feature and its mirrored feature serve a same purpose, they are counted as one feature in the table.

**Table S1.** Feature statistics for the proposed model.

| Feature set                  | Feature affinity | Count  | Note                                                              |
|------------------------------|------------------|--------|-------------------------------------------------------------------|
| $\mathcal{F}_{\text{PRF}}$   | Node or Edge     | 1,010  | E.g., nReviews, nTrustors, ...                                    |
| $\mathcal{F}_{\text{UGC}}$   | Edge             | 1,515  | E.g., rNouns, rPositives, rHedges, ...                            |
| $\mathcal{F}_{\text{TP}}$    | Node             | 16     | E.g., d000, d001, ..., d111, ..., t111                            |
| $\mathcal{F}_{\text{TAUX}}$  | Edge             | 12     | 6 for $E_{u \leftrightarrow t}$ , 6 for $E_{t \leftrightarrow u}$ |
| $\mathcal{F}_{\text{TPAUX}}$ | Edge             | 2      | For $E_{t \leftrightarrow t}$                                     |
| Node features                |                  | 3,062  | $= 1010 \times 3 + 16 \times 2$                                   |
| Edge features                |                  | 15,230 | $= (1010 + 1515 + 12) \times 6 + 2 \times 4$                      |
| All features                 |                  | 18,292 | $= 3062 + 15230$                                                  |

## 2. Full results

In this section, the full results for all experiments from the first set and the second set are listed.

### 2.1. Results for the first experiment set

In this section, we report results for all eight experiments in the first experiment set. Tables S2, S3, S4 and S5 respectively list the proposed model’s performance results evaluated by Accuracy, Precision, Recall and  $F_1$  score.

**Table S2.** (1<sup>st</sup> set) Experimental result of the proposed model evaluated by Accuracy.

| Training–Test | # of experiment |        |        |        |        |        |        |        |
|---------------|-----------------|--------|--------|--------|--------|--------|--------|--------|
|               | 1               | 2      | 3      | 4      | 5      | 6      | 7      | 8      |
| 50% – 50%     | 0.6464          | 0.7776 | 0.9678 | 0.6492 | 0.9647 | 0.8886 | 0.9664 | 0.9657 |
| 60% – 40%     | 0.6531          | 0.7960 | 0.9673 | 0.6518 | 0.9672 | 0.8856 | 0.9660 | 0.9658 |
| 70% – 30%     | 0.6496          | 0.7787 | 0.9673 | 0.6550 | 0.9648 | 0.8800 | 0.9675 | 0.9642 |
| 80% – 20%     | 0.6572          | 0.7841 | 0.9684 | 0.6611 | 0.9643 | 0.8805 | 0.9627 | 0.9654 |
| 90% – 10%     | 0.6775          | 0.7795 | 0.9804 | 0.6675 | 0.9706 | 0.8846 | 0.9590 | 0.9600 |

**Table S3.** (1<sup>st</sup> set) Experimental result of the proposed model evaluated by Precision.

| Training–Test | # of experiment |        |        |        |        |        |        |        |
|---------------|-----------------|--------|--------|--------|--------|--------|--------|--------|
|               | 1               | 2      | 3      | 4      | 5      | 6      | 7      | 8      |
| 50% – 50%     | 0.6025          | 0.8738 | 1.0000 | 0.6009 | 1.0000 | 0.8554 | 0.9496 | 0.9493 |
| 60% – 40%     | 0.6060          | 0.8621 | 1.0000 | 0.6026 | 1.0000 | 0.8485 | 0.9496 | 0.9496 |
| 70% – 30%     | 0.6052          | 0.8674 | 1.0000 | 0.6051 | 1.0000 | 0.8389 | 0.9496 | 0.9474 |
| 80% – 20%     | 0.6117          | 0.8581 | 1.0000 | 0.6096 | 1.0000 | 0.8445 | 0.9449 | 0.9457 |
| 90% – 10%     | 0.6286          | 0.8709 | 1.0000 | 0.6139 | 1.0000 | 0.8480 | 0.9357 | 0.9382 |

**Table S4.** (1<sup>st</sup> set) Experimental result of the proposed model evaluated by Recall.

| Training–Test | # of experiment |        |        |        |        |        |        |        |
|---------------|-----------------|--------|--------|--------|--------|--------|--------|--------|
|               | 1               | 2      | 3      | 4      | 5      | 6      | 7      | 8      |
| 50% – 50%     | 0.9664          | 0.6754 | 0.9389 | 0.9946 | 0.9329 | 0.9488 | 0.9888 | 0.9875 |
| 60% – 40%     | 0.9766          | 0.7294 | 0.9378 | 0.9954 | 0.9377 | 0.9529 | 0.9880 | 0.9874 |
| 70% – 30%     | 0.9628          | 0.6846 | 0.9380 | 0.9936 | 0.9332 | 0.9559 | 0.9908 | 0.9869 |
| 80% – 20%     | 0.9564          | 0.7071 | 0.9401 | 0.9919 | 0.9323 | 0.9478 | 0.9867 | 0.9911 |
| 90% – 10%     | 0.9480          | 0.6825 | 0.9628 | 0.9943 | 0.9442 | 0.9514 | 0.9903 | 0.9893 |

**Table S5.** (1<sup>st</sup> set) Experimental result of the proposed model evaluated by F<sub>1</sub> score.

| Training–Test | # of experiment |        |        |        |        |        |        |        |
|---------------|-----------------|--------|--------|--------|--------|--------|--------|--------|
|               | 1               | 2      | 3      | 4      | 5      | 6      | 7      | 8      |
| 50% – 50%     | 0.7422          | 0.7619 | 0.9685 | 0.7492 | 0.9653 | 0.8997 | 0.9688 | 0.9680 |
| 60% – 40%     | 0.7479          | 0.7902 | 0.9679 | 0.7508 | 0.9679 | 0.8977 | 0.9684 | 0.9681 |
| 70% – 30%     | 0.7432          | 0.7652 | 0.9680 | 0.7521 | 0.9654 | 0.8935 | 0.9698 | 0.9667 |
| 80% – 20%     | 0.7462          | 0.7753 | 0.9691 | 0.7551 | 0.9650 | 0.8932 | 0.9653 | 0.9679 |
| 90% – 10%     | 0.7559          | 0.7653 | 0.9810 | 0.7591 | 0.9713 | 0.8967 | 0.9622 | 0.9631 |

Tables S6, S7, S8 and S9 respectively list SVM's performance results evaluated by Accuracy, Precision, Recall and F<sub>1</sub> score. It's worth noting that Experiment #1 that uses feature set  $\mathcal{F}_{\text{TAUX}}$  isn't available for experiments for all the comparison methods, and the reason is discussed in the paper. Besides, feature set  $\mathcal{F}_{\text{TPAUX}}$  that has been used in experiments #4, #6, #7 and #8 for the proposed model is also unavailable for these methods.

**Table S6.** (1<sup>st</sup> set) Experimental result of SVM evaluated by Accuracy.

| Training–Test | # of experiment |        |        |        |        |        |        |        |
|---------------|-----------------|--------|--------|--------|--------|--------|--------|--------|
|               | 1               | 2      | 3      | 4      | 5      | 6      | 7      | 8      |
| 50% – 50%     | N/A             | 0.8577 | 0.7439 | 0.8193 | 0.8415 | 0.9106 | 0.8339 | 0.8874 |
| 60% – 40%     | N/A             | 0.8589 | 0.7483 | 0.8212 | 0.8437 | 0.9139 | 0.8386 | 0.8924 |
| 70% – 30%     | N/A             | 0.8607 | 0.7509 | 0.8163 | 0.8455 | 0.9120 | 0.8355 | 0.8916 |
| 80% – 20%     | N/A             | 0.8621 | 0.7511 | 0.8062 | 0.8476 | 0.9093 | 0.8313 | 0.8919 |
| 90% – 10%     | N/A             | 0.8627 | 0.7521 | 0.8135 | 0.8518 | 0.9143 | 0.8366 | 0.8972 |

**Table S7.** (1<sup>st</sup> set) Experimental result of SVM evaluated by Precision.

| Training–Test | # of experiment |        |        |        |        |        |        |        |
|---------------|-----------------|--------|--------|--------|--------|--------|--------|--------|
|               | 1               | 2      | 3      | 4      | 5      | 6      | 7      | 8      |
| 50% – 50%     | N/A             | 0.8765 | 0.7625 | 0.9429 | 0.8351 | 0.9074 | 0.9043 | 0.8727 |
| 60% – 40%     | N/A             | 0.8783 | 0.7672 | 0.9460 | 0.8395 | 0.9106 | 0.9061 | 0.8786 |
| 70% – 30%     | N/A             | 0.8813 | 0.7700 | 0.9461 | 0.8426 | 0.9122 | 0.9093 | 0.8810 |
| 80% – 20%     | N/A             | 0.8834 | 0.7710 | 0.9400 | 0.8459 | 0.9127 | 0.9089 | 0.8838 |
| 90% – 10%     | N/A             | 0.8870 | 0.7753 | 0.9348 | 0.8525 | 0.9127 | 0.9125 | 0.8876 |

**Table S8.** (1<sup>st</sup> set) Experimental result of SVM evaluated by Recall.

| Training–Test | # of experiment |        |        |        |        |        |        |        |
|---------------|-----------------|--------|--------|--------|--------|--------|--------|--------|
|               | 1               | 2      | 3      | 4      | 5      | 6      | 7      | 8      |
| 50% – 50%     | N/A             | 0.8497 | 0.7463 | 0.6994 | 0.8710 | 0.9247 | 0.7657 | 0.9206 |
| 60% – 40%     | N/A             | 0.8501 | 0.7497 | 0.7007 | 0.8697 | 0.9277 | 0.7738 | 0.9234 |
| 70% – 30%     | N/A             | 0.8501 | 0.7518 | 0.6906 | 0.8690 | 0.9217 | 0.7640 | 0.9184 |
| 80% – 20%     | N/A             | 0.8505 | 0.7504 | 0.6752 | 0.8691 | 0.9155 | 0.7555 | 0.9150 |
| 90% – 10%     | N/A             | 0.8474 | 0.7455 | 0.6943 | 0.8690 | 0.9260 | 0.7629 | 0.9216 |

**Table S9.** (1<sup>st</sup> set) Experimental result of SVM evaluated by F<sub>1</sub> score.

| Training–Test | # of experiment |        |        |        |        |        |        |        |
|---------------|-----------------|--------|--------|--------|--------|--------|--------|--------|
|               | 1               | 2      | 3      | 4      | 5      | 6      | 7      | 8      |
| 50% – 50%     | N/A             | 0.8629 | 0.7543 | 0.8031 | 0.8527 | 0.9160 | 0.8293 | 0.8960 |
| 60% – 40%     | N/A             | 0.8639 | 0.7584 | 0.8051 | 0.8543 | 0.9190 | 0.8347 | 0.9004 |
| 70% – 30%     | N/A             | 0.8654 | 0.7608 | 0.7984 | 0.8556 | 0.9170 | 0.8303 | 0.8993 |
| 80% – 20%     | N/A             | 0.8666 | 0.7606 | 0.7859 | 0.8573 | 0.9141 | 0.8252 | 0.8991 |
| 90% – 10%     | N/A             | 0.8667 | 0.7601 | 0.7968 | 0.8607 | 0.9193 | 0.8310 | 0.9043 |

Tables S10, S11, S12 and S13 respectively list Decision Tree's performance results evaluated by Accuracy, Precision, Recall and F<sub>1</sub> score.

**Table S10.** (1<sup>st</sup> set) Experimental result of Decision Tree evaluated by Accuracy.

| Training–Test | # of experiment |        |        |        |        |        |        |        |
|---------------|-----------------|--------|--------|--------|--------|--------|--------|--------|
|               | 1               | 2      | 3      | 4      | 5      | 6      | 7      | 8      |
| 50% – 50%     | N/A             | 0.8101 | 0.6882 | 0.8193 | 0.7925 | 0.8778 | 0.8303 | 0.8688 |
| 60% – 40%     | N/A             | 0.8124 | 0.6878 | 0.8212 | 0.7904 | 0.8847 | 0.8325 | 0.8780 |
| 70% – 30%     | N/A             | 0.8129 | 0.6918 | 0.8163 | 0.7957 | 0.8853 | 0.8292 | 0.8755 |
| 80% – 20%     | N/A             | 0.8146 | 0.6936 | 0.8062 | 0.7952 | 0.8729 | 0.8263 | 0.8626 |
| 90% – 10%     | N/A             | 0.8159 | 0.6838 | 0.8135 | 0.7954 | 0.8741 | 0.8305 | 0.8689 |

**Table S11.** (1<sup>st</sup> set) Experimental result of Decision Tree evaluated by Precision.

| Training–Test | # of experiment |        |        |        |        |        |        |        |
|---------------|-----------------|--------|--------|--------|--------|--------|--------|--------|
|               | 1               | 2      | 3      | 4      | 5      | 6      | 7      | 8      |
| 50% – 50%     | N/A             | 0.8247 | 0.7312 | 0.9429 | 0.8057 | 0.8778 | 0.8363 | 0.8706 |
| 60% – 40%     | N/A             | 0.8282 | 0.7303 | 0.9460 | 0.8075 | 0.8783 | 0.8369 | 0.8734 |
| 70% – 30%     | N/A             | 0.8273 | 0.7356 | 0.9461 | 0.8100 | 0.8809 | 0.8355 | 0.8737 |
| 80% – 20%     | N/A             | 0.8302 | 0.7372 | 0.9400 | 0.8136 | 0.8793 | 0.8387 | 0.8678 |
| 90% – 10%     | N/A             | 0.8321 | 0.7331 | 0.9348 | 0.8112 | 0.8761 | 0.8373 | 0.8721 |

**Table S12.** (1<sup>st</sup> set) Experimental result of Decision Tree evaluated by Recall.

| Training–Test | # of experiment |        |        |        |        |        |        |        |
|---------------|-----------------|--------|--------|--------|--------|--------|--------|--------|
|               | 1               | 2      | 3      | 4      | 5      | 6      | 7      | 8      |
| 50% – 50%     | N/A             | 0.8122 | 0.6455 | 0.6994 | 0.7988 | 0.8923 | 0.8429 | 0.8821 |
| 60% – 40%     | N/A             | 0.8124 | 0.6459 | 0.7007 | 0.7907 | 0.9068 | 0.8471 | 0.8987 |
| 70% – 30%     | N/A             | 0.8150 | 0.6480 | 0.6906 | 0.7997 | 0.9045 | 0.8415 | 0.8928 |
| 80% – 20%     | N/A             | 0.8146 | 0.6500 | 0.6752 | 0.7929 | 0.8794 | 0.8299 | 0.8719 |
| 90% – 10%     | N/A             | 0.8151 | 0.6285 | 0.6943 | 0.7971 | 0.8865 | 0.8418 | 0.8803 |

**Table S13.** (1<sup>st</sup> set) Experimental result of Decision Tree evaluated by F<sub>1</sub> score.

| Training–Test | # of experiment |        |        |        |        |        |        |        |
|---------------|-----------------|--------|--------|--------|--------|--------|--------|--------|
|               | 1               | 2      | 3      | 4      | 5      | 6      | 7      | 8      |
| 50% – 50%     | N/A             | 0.8184 | 0.6856 | 0.8031 | 0.8022 | 0.8850 | 0.8396 | 0.8763 |
| 60% – 40%     | N/A             | 0.8202 | 0.6855 | 0.8051 | 0.7990 | 0.8923 | 0.8420 | 0.8859 |
| 70% – 30%     | N/A             | 0.8211 | 0.6890 | 0.7984 | 0.8048 | 0.8925 | 0.8385 | 0.8831 |
| 80% – 20%     | N/A             | 0.8223 | 0.6909 | 0.7859 | 0.8031 | 0.8793 | 0.8343 | 0.8699 |
| 90% – 10%     | N/A             | 0.8235 | 0.6768 | 0.7968 | 0.8041 | 0.8812 | 0.8396 | 0.8762 |

Tables [S14](#), [S15](#), [S16](#) and [S17](#) respectively list Random Forest’s performance results evaluated by Accuracy, Precision, Recall and F<sub>1</sub> score.

**Table S14.** (1<sup>st</sup> set) Experimental result of Random Forest evaluated by Accuracy.

| Training–Test | # of experiment |        |        |        |        |        |        |        |
|---------------|-----------------|--------|--------|--------|--------|--------|--------|--------|
|               | 1               | 2      | 3      | 4      | 5      | 6      | 7      | 8      |
| 50% – 50%     | N/A             | 0.8573 | 0.7993 | 0.8193 | 0.8634 | 0.9193 | 0.8860 | 0.9212 |
| 60% – 40%     | N/A             | 0.8580 | 0.8013 | 0.8212 | 0.8636 | 0.9215 | 0.8907 | 0.9239 |
| 70% – 30%     | N/A             | 0.8586 | 0.8003 | 0.8163 | 0.8640 | 0.9178 | 0.8863 | 0.9215 |
| 80% – 20%     | N/A             | 0.8585 | 0.8019 | 0.8062 | 0.8655 | 0.9129 | 0.8796 | 0.9152 |
| 90% – 10%     | N/A             | 0.8593 | 0.8055 | 0.8135 | 0.8671 | 0.9152 | 0.8846 | 0.9198 |

**Table S15.** (1<sup>st</sup> set) Experimental result of Random Forest evaluated by Precision.

| Training–Test | # of experiment |        |        |        |        |        |        |        |
|---------------|-----------------|--------|--------|--------|--------|--------|--------|--------|
|               | 1               | 2      | 3      | 4      | 5      | 6      | 7      | 8      |
| 50% – 50%     | N/A             | 0.8735 | 0.8333 | 0.9429 | 0.8886 | 0.9250 | 0.9243 | 0.9303 |
| 60% – 40%     | N/A             | 0.8723 | 0.8341 | 0.9460 | 0.8868 | 0.9250 | 0.9262 | 0.9305 |
| 70% – 30%     | N/A             | 0.8724 | 0.8320 | 0.9461 | 0.8871 | 0.9236 | 0.9250 | 0.9314 |
| 80% – 20%     | N/A             | 0.8717 | 0.8347 | 0.9400 | 0.8899 | 0.9196 | 0.9234 | 0.9271 |
| 90% – 10%     | N/A             | 0.8731 | 0.8404 | 0.9348 | 0.8921 | 0.9162 | 0.9234 | 0.9249 |

**Table S16.** (1<sup>st</sup> set) Experimental result of Random Forest evaluated by Recall.

| Training–Test | # of experiment |        |        |        |        |        |        |        |
|---------------|-----------------|--------|--------|--------|--------|--------|--------|--------|
|               | 1               | 2      | 3      | 4      | 5      | 6      | 7      | 8      |
| 50% – 50%     | N/A             | 0.8526 | 0.7739 | 0.6994 | 0.8469 | 0.9217 | 0.8536 | 0.9192 |
| 60% – 40%     | N/A             | 0.8557 | 0.7775 | 0.7007 | 0.8496 | 0.9261 | 0.8612 | 0.9246 |
| 70% – 30%     | N/A             | 0.8568 | 0.7781 | 0.6906 | 0.8500 | 0.9200 | 0.8534 | 0.9188 |
| 80% – 20%     | N/A             | 0.8576 | 0.7781 | 0.6752 | 0.8500 | 0.9148 | 0.8412 | 0.9107 |
| 90% – 10%     | N/A             | 0.8575 | 0.7787 | 0.6943 | 0.8506 | 0.9236 | 0.8515 | 0.9228 |

**Table S17.** (1<sup>st</sup> set) Experimental result of Random Forest evaluated by  $F_1$  score.

| Training–Test | # of experiment |        |        |        |        |        |        |        |
|---------------|-----------------|--------|--------|--------|--------|--------|--------|--------|
|               | 1               | 2      | 3      | 4      | 5      | 6      | 7      | 8      |
| 50% – 50%     | N/A             | 0.8630 | 0.8025 | 0.8031 | 0.8673 | 0.9233 | 0.8875 | 0.9247 |
| 60% – 40%     | N/A             | 0.8639 | 0.8048 | 0.8051 | 0.8678 | 0.9255 | 0.8925 | 0.9275 |
| 70% – 30%     | N/A             | 0.8646 | 0.8042 | 0.7984 | 0.8682 | 0.9218 | 0.8877 | 0.9250 |
| 80% – 20%     | N/A             | 0.8646 | 0.8054 | 0.7859 | 0.8695 | 0.9172 | 0.8804 | 0.9188 |
| 90% – 10%     | N/A             | 0.8653 | 0.8084 | 0.7968 | 0.8709 | 0.9199 | 0.8860 | 0.9238 |

## 2.2. Results for the second experiment set

In this section, we report results for experiments #2–7 in the second experiment set with reduced feature data. In these experiments, features in the  $\mathcal{F}_{\text{TAUX}}$  set was not involved, and similarly, comparison methods didn't use features from the  $\mathcal{F}_{\text{TPAUX}}$  set. They were conducted on the split 90% – 10% training–train data set with removal of varied percentages of features. The removal ratios were 20%, 40%, 60% and 80%. Results from the first set of experiments with the same setup but no feature removed (the removal ratio is 0%) are also listed for comparison.

Tables S18, S19, S20 and S21 respectively list the proposed model's performance results evaluated by Accuracy, Precision, Recall and  $F_1$  score.

**Table S18.** (2<sup>nd</sup> set) Experimental result of the proposed model evaluated by Accuracy.

| % of removed features | # of experiment |        |        |        |        |        |
|-----------------------|-----------------|--------|--------|--------|--------|--------|
|                       | 2               | 3      | 4      | 5      | 6      | 7      |
| 80%                   | 0.6764          | 0.7640 | 0.6668 | 0.7642 | 0.6655 | 0.7609 |
| 60%                   | 0.7238          | 0.8389 | 0.6695 | 0.8548 | 0.7385 | 0.8047 |
| 40%                   | 0.7554          | 0.8909 | 0.6719 | 0.8991 | 0.7858 | 0.8650 |
| 20%                   | 0.7703          | 0.9305 | 0.6692 | 0.9368 | 0.8406 | 0.9153 |
| 0%                    | 0.7795          | 0.9804 | 0.6675 | 0.9706 | 0.8846 | 0.9590 |

**Table S19.** (2<sup>nd</sup> set) Experimental result of the proposed model evaluated by Precision.

| % of removed features | # of experiment |        |        |        |        |        |
|-----------------------|-----------------|--------|--------|--------|--------|--------|
|                       | 2               | 3      | 4      | 5      | 6      | 7      |
| 80%                   | 0.6275          | 0.7073 | 0.6139 | 0.7070 | 0.6125 | 0.6906 |
| 60%                   | 0.6776          | 0.7932 | 0.6155 | 0.8320 | 0.6721 | 0.7332 |
| 40%                   | 0.7386          | 0.8578 | 0.6172 | 0.9044 | 0.7195 | 0.7999 |
| 20%                   | 0.7983          | 0.9207 | 0.6154 | 0.9706 | 0.7844 | 0.8664 |
| 0%                    | 0.8709          | 1.0000 | 0.6139 | 1.0000 | 0.8480 | 0.9357 |

**Table S20.** (2<sup>nd</sup> set) Experimental result of the proposed model evaluated by Recall.

| % of removed features | # of experiment |        |        |        |        |        |
|-----------------------|-----------------|--------|--------|--------|--------|--------|
|                       | 2               | 3      | 4      | 5      | 6      | 7      |
| 80%                   | 0.9493          | 0.9418 | 0.9910 | 0.9433 | 0.9941 | 0.9893 |
| 60%                   | 0.9074          | 0.9390 | 0.9927 | 0.9076 | 0.9831 | 0.9892 |
| 40%                   | 0.8292          | 0.9505 | 0.9929 | 0.9041 | 0.9727 | 0.9919 |
| 20%                   | 0.7546          | 0.9498 | 0.9926 | 0.9074 | 0.9618 | 0.9924 |
| 0%                    | 0.6825          | 0.9628 | 0.9943 | 0.9442 | 0.9514 | 0.9903 |

**Table S21.** (2<sup>nd</sup> set) Experimental result of the proposed model evaluated by F<sub>1</sub> score.

| % of removed features | # of experiment |        |        |        |        |        |
|-----------------------|-----------------|--------|--------|--------|--------|--------|
|                       | 2               | 3      | 4      | 5      | 6      | 7      |
| 80%                   | 0.7556          | 0.8079 | 0.7581 | 0.8083 | 0.7580 | 0.8134 |
| 60%                   | 0.7759          | 0.8599 | 0.7599 | 0.8682 | 0.7984 | 0.8422 |
| 40%                   | 0.7813          | 0.9018 | 0.7613 | 0.9043 | 0.8271 | 0.8856 |
| 20%                   | 0.7758          | 0.9350 | 0.7597 | 0.9380 | 0.8641 | 0.9251 |
| 0%                    | 0.7653          | 0.9810 | 0.7591 | 0.9713 | 0.8967 | 0.9622 |

Tables [S22](#), [S23](#), [S24](#) and [S25](#) respectively list SVM's performance results evaluated by Accuracy, Precision, Recall and F<sub>1</sub> score.

**Table S22.** (2<sup>nd</sup> set) Experimental result of SVM evaluated by Accuracy.

| % of removed features | # of experiment |        |        |        |        |        |
|-----------------------|-----------------|--------|--------|--------|--------|--------|
|                       | 2               | 3      | 4      | 5      | 6      | 7      |
| 80%                   | 0.7504          | 0.5640 | 0.8135 | 0.7296 | 0.8387 | 0.8320 |
| 60%                   | 0.7812          | 0.6258 | 0.8135 | 0.7451 | 0.8579 | 0.8409 |
| 40%                   | 0.8113          | 0.6847 | 0.8135 | 0.7957 | 0.8807 | 0.8573 |
| 20%                   | 0.8358          | 0.7200 | 0.8135 | 0.8316 | 0.8982 | 0.8672 |
| 0%                    | 0.8627          | 0.7521 | 0.8135 | 0.8518 | 0.9143 | 0.8366 |

**Table S23.** (2<sup>nd</sup> set) Experimental result of SVM evaluated by Precision.

| % of removed features | # of experiment |        |        |        |        |        |
|-----------------------|-----------------|--------|--------|--------|--------|--------|
|                       | 2               | 3      | 4      | 5      | 6      | 7      |
| 80%                   | 0.7163          | 0.7022 | 0.9348 | 0.7091 | 0.9094 | 0.9331 |
| 60%                   | 0.7612          | 0.6961 | 0.9348 | 0.7803 | 0.8947 | 0.9170 |
| 40%                   | 0.8093          | 0.7097 | 0.9348 | 0.8132 | 0.8955 | 0.9019 |
| 20%                   | 0.8499          | 0.7080 | 0.9348 | 0.8429 | 0.9030 | 0.8821 |
| 0%                    | 0.8870          | 0.7753 | 0.9348 | 0.8525 | 0.9127 | 0.9125 |

**Table S24.** (2<sup>nd</sup> set) Experimental result of SVM evaluated by Recall.

| % of removed features | # of experiment |        |        |        |        |        |
|-----------------------|-----------------|--------|--------|--------|--------|--------|
|                       | 2               | 3      | 4      | 5      | 6      | 7      |
| 80%                   | 0.8714          | 0.2992 | 0.6943 | 0.8252 | 0.7706 | 0.7337 |
| 60%                   | 0.8518          | 0.5141 | 0.6943 | 0.7186 | 0.8277 | 0.7675 |
| 40%                   | 0.8395          | 0.6793 | 0.6943 | 0.7948 | 0.8758 | 0.8180 |
| 20%                   | 0.8359          | 0.7973 | 0.6943 | 0.8362 | 0.9038 | 0.8633 |
| 0%                    | 0.8474          | 0.7455 | 0.6943 | 0.8690 | 0.9260 | 0.7629 |

**Table S25.** (2<sup>nd</sup> set) Experimental result of SVM evaluated by F<sub>1</sub> score.

| % of removed features | # of experiment |        |        |        |        |        |
|-----------------------|-----------------|--------|--------|--------|--------|--------|
|                       | 2               | 3      | 4      | 5      | 6      | 7      |
| 80%                   | 0.7863          | 0.4196 | 0.7968 | 0.7628 | 0.8343 | 0.8215 |
| 60%                   | 0.8040          | 0.5914 | 0.7968 | 0.7482 | 0.8599 | 0.8356 |
| 40%                   | 0.8241          | 0.6942 | 0.7968 | 0.8039 | 0.8855 | 0.8579 |
| 20%                   | 0.8429          | 0.7500 | 0.7968 | 0.8395 | 0.9034 | 0.8726 |
| 0%                    | 0.8667          | 0.7601 | 0.7968 | 0.8607 | 0.9193 | 0.8310 |

Tables [S26](#), [S27](#), [S28](#) and [S29](#) respectively list Decision Tree's performance results evaluated by Accuracy, Precision, Recall and F<sub>1</sub> score.

**Table S26.** (2<sup>nd</sup> set) Experimental result of Decision Tree evaluated by Accuracy.

| % of removed features | # of experiment |        |        |        |        |        |
|-----------------------|-----------------|--------|--------|--------|--------|--------|
|                       | 2               | 3      | 4      | 5      | 6      | 7      |
| 80%                   | 0.7429          | 0.5535 | 0.8135 | 0.7276 | 0.8375 | 0.8146 |
| 60%                   | 0.7672          | 0.5982 | 0.8135 | 0.7389 | 0.8527 | 0.8061 |
| 40%                   | 0.7869          | 0.6252 | 0.8135 | 0.7465 | 0.8684 | 0.7907 |
| 20%                   | 0.7971          | 0.6461 | 0.8135 | 0.7421 | 0.8739 | 0.7697 |
| 0%                    | 0.8159          | 0.6838 | 0.8135 | 0.7954 | 0.8741 | 0.8305 |

**Table S27.** (2<sup>nd</sup> set) Experimental result of Decision Tree evaluated by Precision.

| % of removed features | # of experiment |        |        |        |        |        |
|-----------------------|-----------------|--------|--------|--------|--------|--------|
|                       | 2               | 3      | 4      | 5      | 6      | 7      |
| 80%                   | 0.7121          | 0.7143 | 0.9348 | 0.7120 | 0.9157 | 0.8750 |
| 60%                   | 0.7545          | 0.6817 | 0.9348 | 0.7417 | 0.8974 | 0.8294 |
| 40%                   | 0.7935          | 0.6658 | 0.9348 | 0.7567 | 0.8910 | 0.7845 |
| 20%                   | 0.8185          | 0.6615 | 0.9348 | 0.7541 | 0.8796 | 0.7440 |
| 0%                    | 0.8321          | 0.7331 | 0.9348 | 0.8112 | 0.8761 | 0.8373 |

**Table S28.** (2<sup>nd</sup> set) Experimental result of Decision Tree evaluated by Recall.

| % of removed features | # of experiment |        |        |        |        |        |
|-----------------------|-----------------|--------|--------|--------|--------|--------|
|                       | 2               | 3      | 4      | 5      | 6      | 7      |
| 80%                   | 0.8594          | 0.2540 | 0.6943 | 0.8111 | 0.7616 | 0.7560 |
| 60%                   | 0.8272          | 0.4453 | 0.6943 | 0.7739 | 0.8132 | 0.7956 |
| 40%                   | 0.8050          | 0.5795 | 0.6943 | 0.7645 | 0.8547 | 0.8310 |
| 20%                   | 0.7900          | 0.6720 | 0.6943 | 0.7577 | 0.8812 | 0.8582 |
| 0%                    | 0.8151          | 0.6285 | 0.6943 | 0.7971 | 0.8865 | 0.8418 |

**Table S29.** (2<sup>nd</sup> set) Experimental result of Decision Tree evaluated by F<sub>1</sub> score.

| % of removed features | # of experiment |        |        |        |        |        |
|-----------------------|-----------------|--------|--------|--------|--------|--------|
|                       | 2               | 3      | 4      | 5      | 6      | 7      |
| 80%                   | 0.7788          | 0.3747 | 0.7968 | 0.7583 | 0.8316 | 0.8111 |
| 60%                   | 0.7892          | 0.5387 | 0.7968 | 0.7575 | 0.8533 | 0.8121 |
| 40%                   | 0.7992          | 0.6197 | 0.7968 | 0.7606 | 0.8725 | 0.8071 |
| 20%                   | 0.8040          | 0.6667 | 0.7968 | 0.7559 | 0.8804 | 0.7970 |
| 0%                    | 0.8235          | 0.6768 | 0.7968 | 0.8041 | 0.8812 | 0.8396 |

Tables [S30](#), [S31](#), [S32](#) and [S33](#) respectively list Random Forest's performance results evaluated by Accuracy, Precision, Recall and F<sub>1</sub> score.

**Table S30.** (2<sup>nd</sup> set) Experimental result of Random Forest evaluated by Accuracy.

| % of removed features | # of experiment |        |        |        |        |        |
|-----------------------|-----------------|--------|--------|--------|--------|--------|
|                       | 2               | 3      | 4      | 5      | 6      | 7      |
| 80%                   | 0.7470          | 0.5723 | 0.8135 | 0.7558 | 0.8407 | 0.7875 |
| 60%                   | 0.7779          | 0.6292 | 0.8135 | 0.7802 | 0.8617 | 0.8117 |
| 40%                   | 0.8058          | 0.6833 | 0.8135 | 0.7945 | 0.8837 | 0.8279 |
| 20%                   | 0.8304          | 0.7040 | 0.8135 | 0.8036 | 0.8970 | 0.8050 |
| 0%                    | 0.8593          | 0.8055 | 0.8135 | 0.8671 | 0.9152 | 0.8846 |

**Table S31.** (2<sup>nd</sup> set) Experimental result of Random Forest evaluated by Precision.

| % of removed features | # of experiment |        |        |        |        |        |
|-----------------------|-----------------|--------|--------|--------|--------|--------|
|                       | 2               | 3      | 4      | 5      | 6      | 7      |
| 80%                   | 0.7133          | 0.7065 | 0.9348 | 0.7225 | 0.9184 | 0.9230 |
| 60%                   | 0.7595          | 0.6839 | 0.9348 | 0.7563 | 0.9069 | 0.8807 |
| 40%                   | 0.8062          | 0.6906 | 0.9348 | 0.7684 | 0.9060 | 0.8245 |
| 20%                   | 0.8451          | 0.6793 | 0.9348 | 0.7738 | 0.9065 | 0.7676 |
| 0%                    | 0.8731          | 0.8404 | 0.9348 | 0.8921 | 0.9162 | 0.9234 |

**Table S32.** (2<sup>nd</sup> set) Experimental result of Random Forest evaluated by Recall.

| % of removed features | # of experiment |        |        |        |        |        |
|-----------------------|-----------------|--------|--------|--------|--------|--------|
|                       | 2               | 3      | 4      | 5      | 6      | 7      |
| 80%                   | 0.8690          | 0.3218 | 0.6943 | 0.8707 | 0.7655 | 0.6510 |
| 60%                   | 0.8464          | 0.5507 | 0.6943 | 0.8599 | 0.8219 | 0.7432 |
| 40%                   | 0.8312          | 0.7225 | 0.6943 | 0.8730 | 0.8694 | 0.8554 |
| 20%                   | 0.8302          | 0.8300 | 0.6943 | 0.8861 | 0.8971 | 0.9034 |
| 0%                    | 0.8575          | 0.7787 | 0.6943 | 0.8506 | 0.9236 | 0.8515 |

**Table S33.** (2<sup>nd</sup> set) Experimental result of Random Forest evaluated by F<sub>1</sub> score.

| % of removed features | # of experiment |        |        |        |        |        |
|-----------------------|-----------------|--------|--------|--------|--------|--------|
|                       | 2               | 3      | 4      | 5      | 6      | 7      |
| 80%                   | 0.7835          | 0.4422 | 0.7968 | 0.7898 | 0.8350 | 0.7635 |
| 60%                   | 0.8006          | 0.6101 | 0.7968 | 0.8048 | 0.8623 | 0.8061 |
| 40%                   | 0.8185          | 0.7062 | 0.7968 | 0.8174 | 0.8873 | 0.8396 |
| 20%                   | 0.8376          | 0.7471 | 0.7968 | 0.8262 | 0.9018 | 0.8300 |
| 0%                    | 0.8653          | 0.8084 | 0.7968 | 0.8709 | 0.9199 | 0.8860 |
